# Supplementary material for: Structural insight into Escherichia coli CsgA amyloid fibril assembly
Source: PubMed Central journal article supplement (PMC11005368; doi:10.1128/mbio.00419-24), 2024-03-19
Supplement: mbio.00419-24-s0001.pdf [file mbio.00419-24-s0001.pdf]

1 Supplementary Information to

2  
3 **Structural insight into *Escherichia coli* CsgA amyloid fibril assembly**

4  
5 **Author List:** Fan Bu<sup>1,2,3#</sup>, Derek R. Dee<sup>2#</sup>, Bin Liu<sup>1#</sup>

6  
7 **Affiliations:**

8 <sup>1</sup>Section of Transcription & Gene Regulation, The Hormel Institute, University of  
9 Minnesota, Austin, MN, USA

10 <sup>2</sup>Faculty of Land and Food Systems, The University of British Columbia, Vancouver, BC,  
11 Canada

12 <sup>3</sup>Department of Pharmacology, University of Minnesota Medical School, Minneapolis, MN,  
13 USA

14  
15 #Correspondence:

16 bu007102@umn.edu (F.B.); derek.dee@ubc.ca (D.D.); liu00794@umn.edu (B.L.)

17  
18 **Contents:**

19 Supplementary Figures: 1-8

20 Supplementary Tables: 1-2

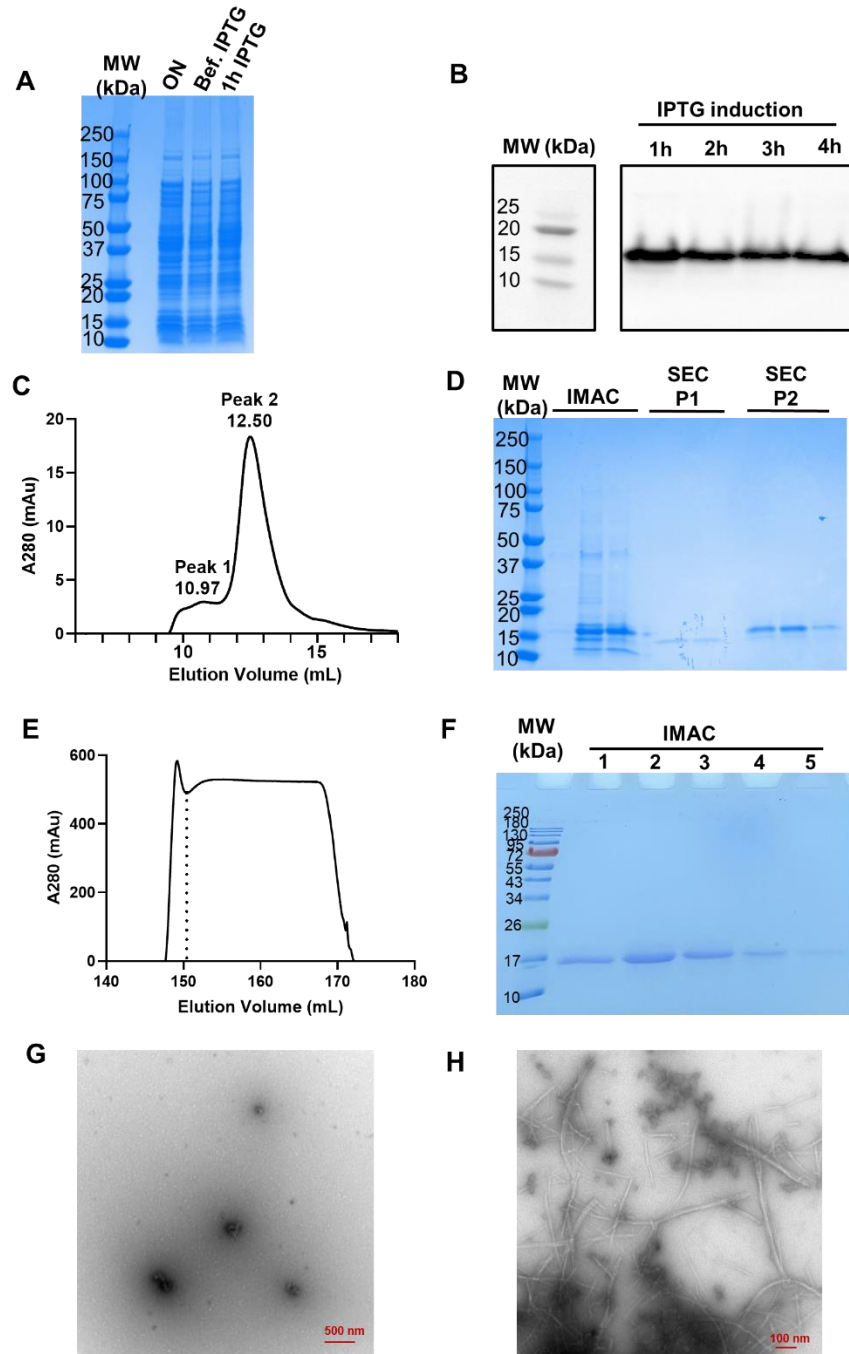

21  
 22 **Supplementary Figure 1:** Expression and purification of CsgA in the absence of  
 23 reducing agent. **(A)** No CsgA band (~15 kDa) was apparent on SDS-PAGE after IPTG  
 24 induction. **(B)** The expression of CsgA was confirmed by western blot. **(C)** Size exclusion  
 25 chromatogram of CsgA purified from 1L of LB and passed through a nickel column and a  
 26 30-kDa spin filter. **(D)** SDS-PAGE revealed that the eluates collected from the nickel  
 27 column contained impurities and were successfully purified using size exclusion  
 28 chromatography. **(E, F)** One-step purification of CsgA from 500 ml TB using cobalt column  
 29 to obtain pure CsgA. **(G)** TEM image of CsgA without reducing agent. **(H)** TEM image of  
 30 CsgA 40 h after adding TCEP.

**A**

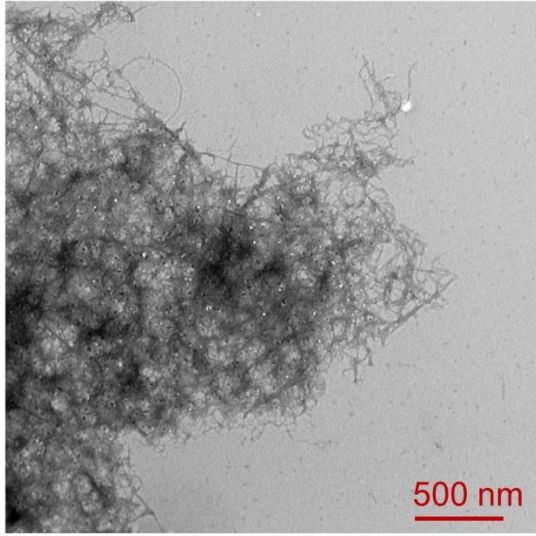

31

**B**

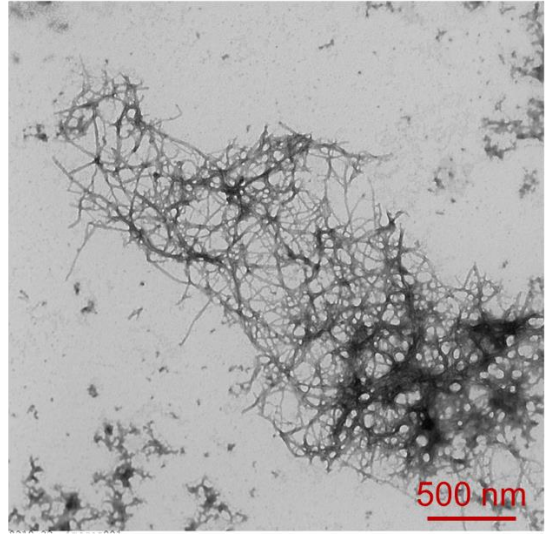

32 **Supplementary Figure 2:** Negative staining TEM of CsgA fibrils obtained in PBS **(A)**  
33 and Tris-HCl, pH 7.2 **(B)**.

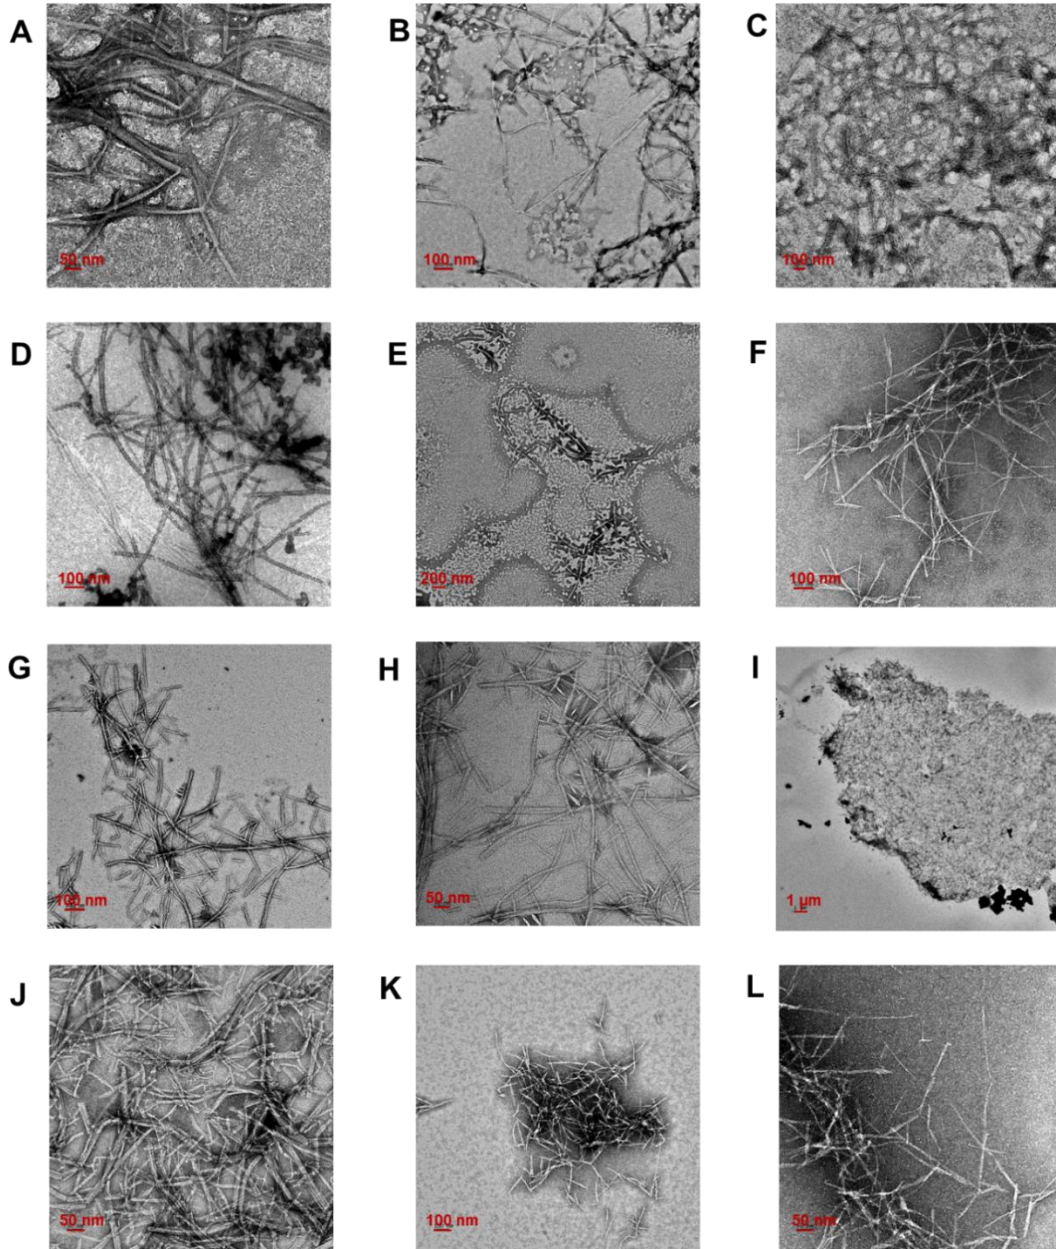

34  
 35  
 36  
 37  
 38  
 39  
 40  
 41  
 42  
 43  
 44  
 45

**Supplementary Figure 3:** Negative staining TEM revealed apparently distinct morphologies for CsgA fibrils obtained under various growth and post-fibrillation conditions. **(A-F)** CsgA fibrils were grown in the presence of different crystallization buffers (1-Butylpyridinium chloride, Triisobutylmethylphosphonium tosylate, Tetrabutylphosphonium bromide, Tetraethylammonium bromide, Benzyltriethylammonium chloride, or 2-Hydroxyethylammonium formate). **(G, H)** CsgA fibrils, formed at 10 mM HEPES buffer (pH 7) +0.01% Tween 20, without shaking, were heated at 70 °C for 30 min. **(I, J)** CsgA fibrils, formed at the same condition, were dialyzed against MilliQ water. **(K, L)** CsgA fibrils at the same condition, were sonicated 20 s, three times.

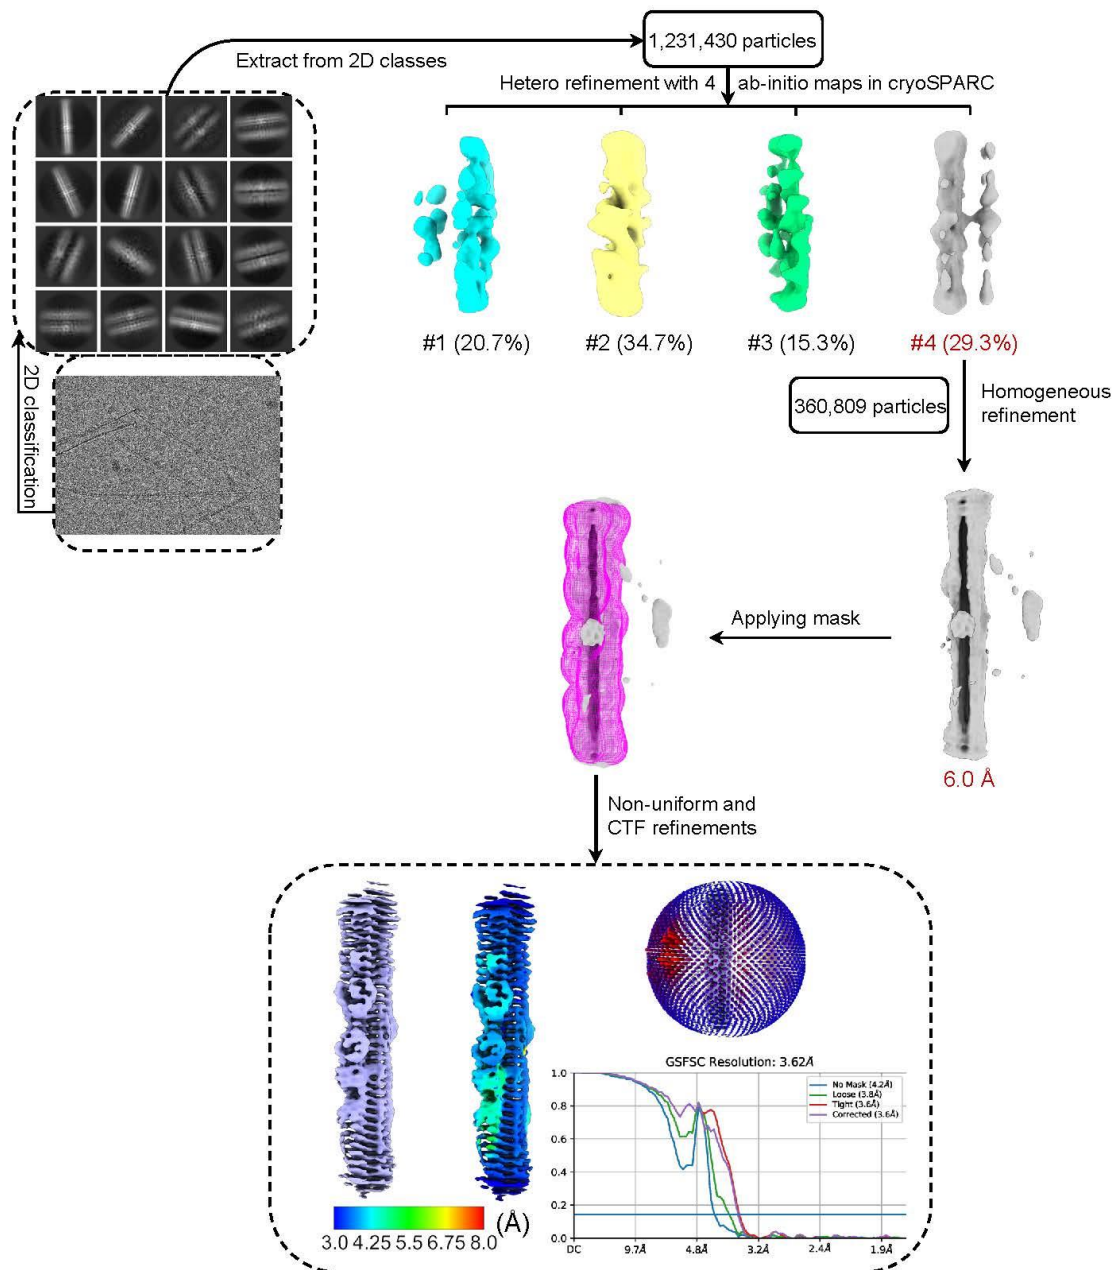

47  
 48 **Supplementary Figure 4:** Flow chart of cryo-EM image processing of CsgA fibrils with a  
 49 218-pixel box size. Representative raw cryo-EM image and 2D classes are presented.  
 50 3D refinement using all the particles in good 3D classes generated a 6.0 Å map. Further  
 51 masked 3D classification generated one fibril conformation. Angular distribution plot is  
 52 displayed. The final maps, half-map FSC curves and accompanying local resolution  
 53 illustrations are enclosed in the dashed black box. The dip in the FSC curves at around  
 54 4.8 Å corresponds to the beta helix winding spacing in CsgA fibrils, similar to observations  
 55 in other bacterial fibrils with comparable beta helical structures (1, 2). Anisotropy in the  
 56 cryo-EM map is also common due to beta stacking in amyloid fibrils.



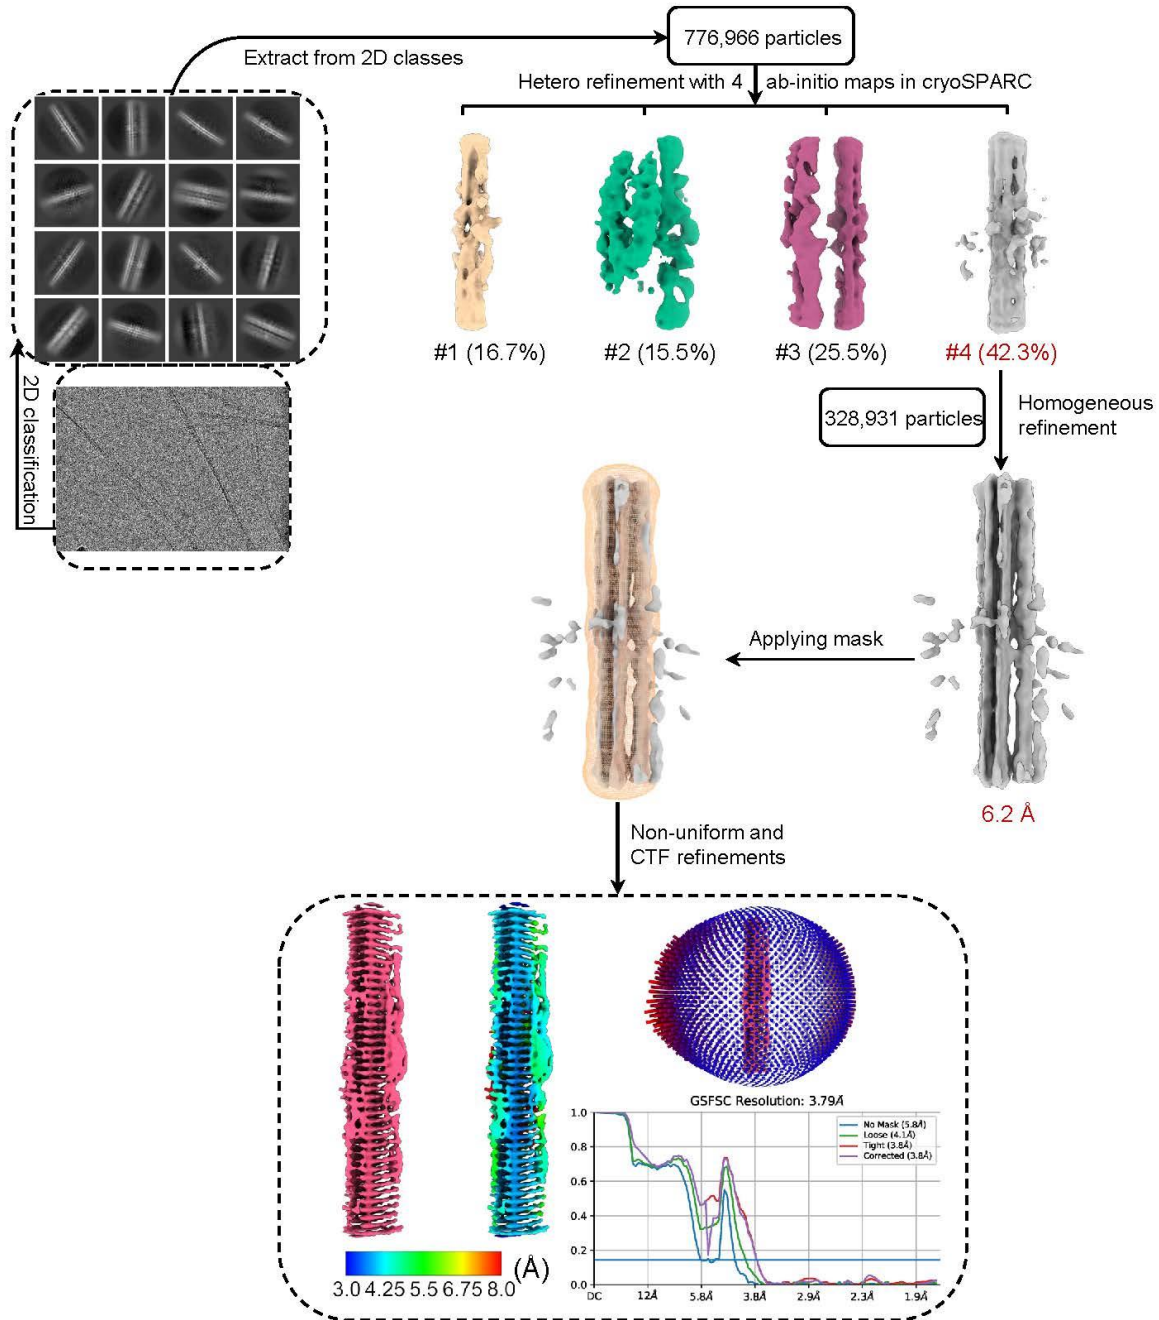

57  
 58 **Supplementary Figure 5:** Flow chart of cryo-EM image of CsgA fibrils with a 260-pixel  
 59 box size. Representative raw cryo-EM image and 2D classes are presented. 3D  
 60 refinement using all the particles in good 3D classes generated a 6.2 Å map. Further  
 61 masked 3D classification generated one fibril conformation. Angular distribution plot is  
 62 displayed. The final maps, half-map FSC curves and accompanying local resolution  
 63 illustrations are enclosed in the dashed black box. The dip in the FSC curves at around  
 64 4.8 Å corresponds to the beta helix winding spacing in CsgA fibrils, similar to observations  
 65 in other bacterial fibrils with comparable beta helical structures (1, 2). Anisotropy in the  
 66 cryo-EM map is also common due to beta stacking in amyloid fibrils.

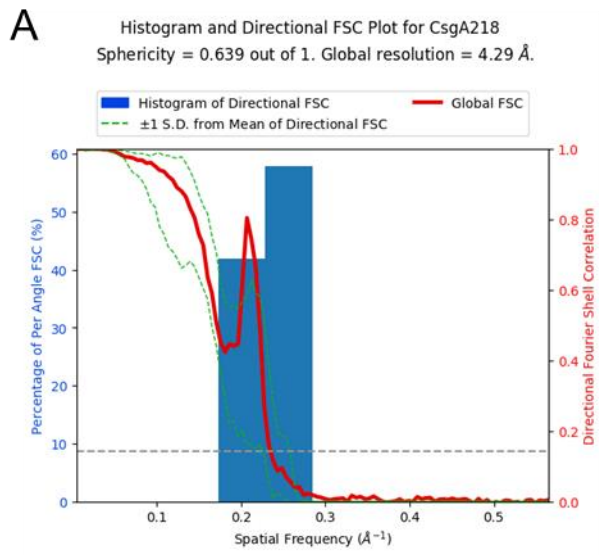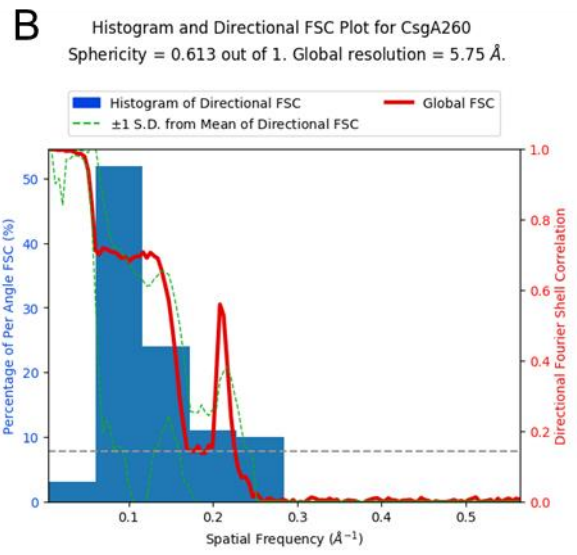

67

68 **Supplementary Figure 6:** Histogram and directional FSC plots of the final 3D  
 69 reconstruction of CsgA amyloid fibril with a 218-pixel box size **(A)** and a 260-pixel box size  
 70 **(B)**. The sphericity values of both maps are indicated.

A

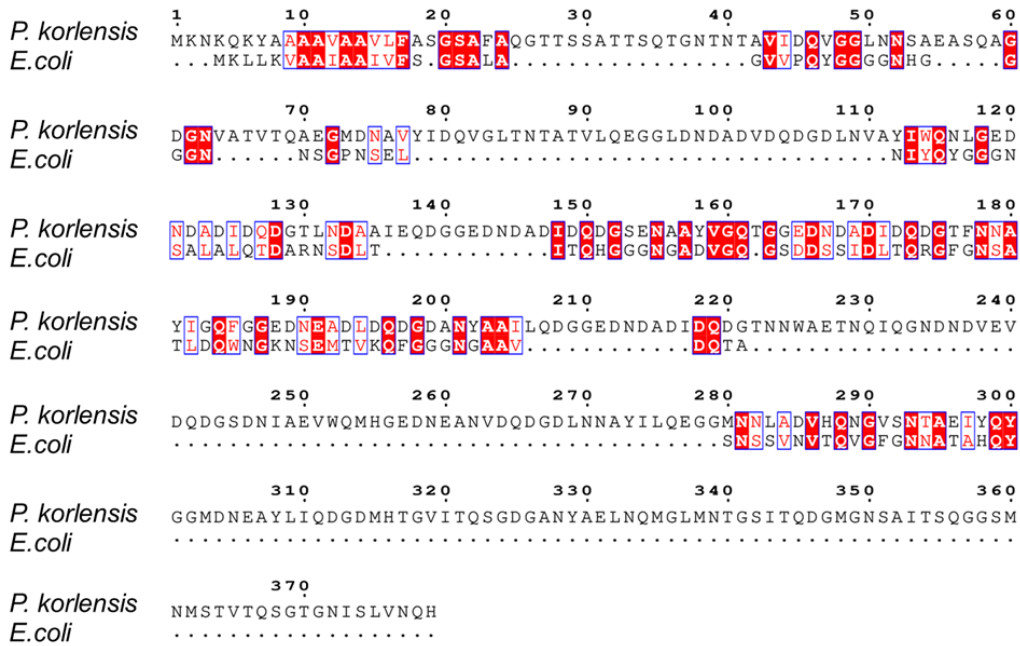

B

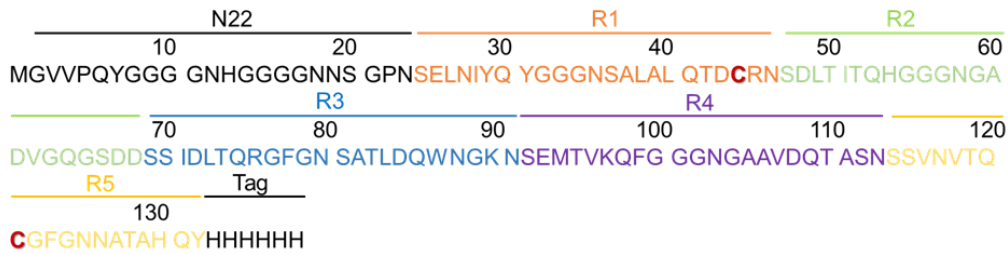

71  
72  
73  
74

**Supplementary Figure 7:** (A) Sequence alignment (Clustal Omega) of CsgA from *P. korlensis* and *E. coli* shows distinct differences. (B) Sequence information for CsgA\_A63C/V140C.



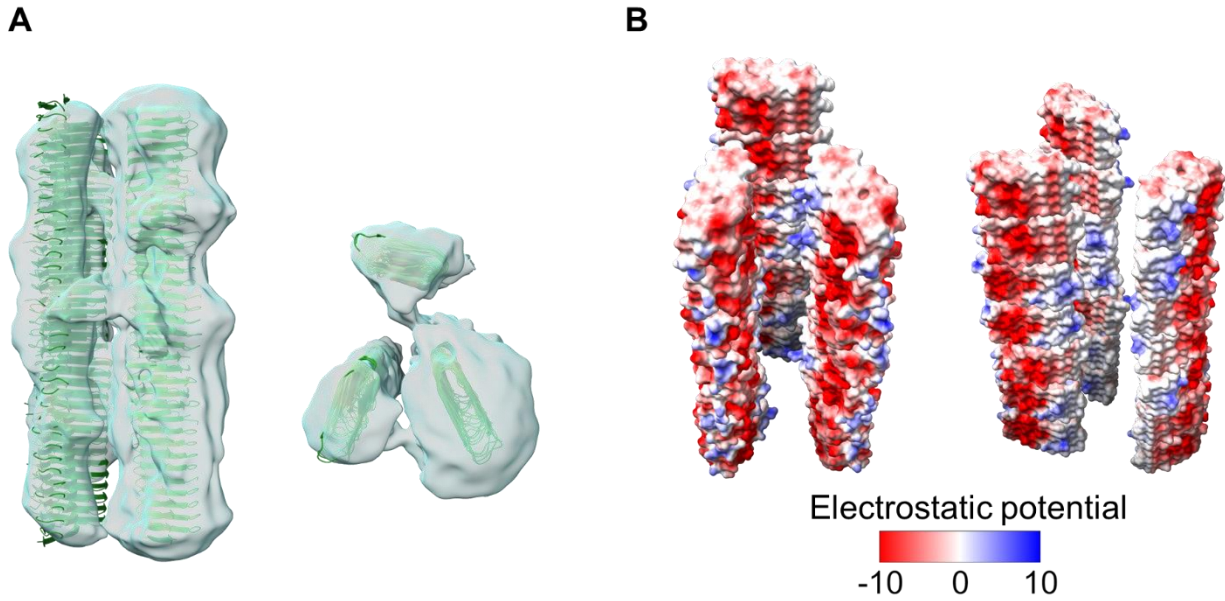

75  
 76 **Supplementary Figure 8:** Class #2 (Supplementary Figure 5) of cryo-EM map generated  
 77 with a 260-pixel box size uncovered a spatial organization among three CsgA fibrils. **(A)**  
 78 3-CsgA-fibril bundle (front and top views). **(B)** Electrostatic potential of 3-CsgA-fibril  
 79 bundle indicated the electrostatic repulsion likely responsible for the de-bundling of CsgA  
 80 fibrils.

81 **Supplementary Table 1: Cryo-EM data collection, refinement and validation statistics.**

|                                                     | <i>E. coli</i> CsgA fibril<br>218-pixel box size<br>(EMDB-28276)<br>(PDB 8ENQ) | <i>E. coli</i> CsgA fibril<br>260-pixel box size<br>(EMDB-28277)<br>(PDB 8ENR) |
|-----------------------------------------------------|--------------------------------------------------------------------------------|--------------------------------------------------------------------------------|
| <b>Data collection and processing</b>               |                                                                                |                                                                                |
| Magnification                                       | 96,000                                                                         | 96,000                                                                         |
| Voltage (kV)                                        | 300                                                                            | 300                                                                            |
| Electron exposure (e <sup>-</sup> /Å <sup>2</sup> ) | 40                                                                             | 40                                                                             |
| Defocus range (μm)                                  | -1.0 ~ -2.4                                                                    | -1.0 ~ -2.4                                                                    |
| Pixel size (Å)                                      | 0.89                                                                           | 0.89                                                                           |
| Symmetry imposed                                    | C1                                                                             | C1                                                                             |
| Initial particle images (no.)                       | 1,231,430                                                                      | 776,966                                                                        |
| Final particle images (no.)                         | 360,809                                                                        | 328,931                                                                        |
| Map resolution (Å)                                  | 3.6                                                                            | 3.8                                                                            |
| FSC threshold                                       | 0.143                                                                          | 0.143                                                                          |
| Map resolution range (Å)                            | 3.0–8.0                                                                        | 3.0–8.0                                                                        |
| <b>Refinement</b>                                   |                                                                                |                                                                                |
| Map sharpening <i>B</i> factor (Å <sup>2</sup> )    | -182.1                                                                         | -186.9                                                                         |
| Model composition                                   |                                                                                |                                                                                |
| Non-hydrogen atoms                                  | 5600                                                                           | 6400                                                                           |
| Protein residues                                    | 777                                                                            | 888                                                                            |
| <i>B</i> factors (Å <sup>2</sup> )                  |                                                                                |                                                                                |
| Protein                                             | 49.04                                                                          | 106.48                                                                         |
| R.m.s. deviations                                   |                                                                                |                                                                                |
| Bond lengths (Å)                                    | 0.004                                                                          | 0.004                                                                          |
| Bond angles (°)                                     | 0.766                                                                          | 0.800                                                                          |
| <b>Validation</b>                                   |                                                                                |                                                                                |
| MolProbity score                                    | 1.67                                                                           | 1.73                                                                           |
| Clashscore                                          | 14.48                                                                          | 17.12                                                                          |
| Poor rotamers (%)                                   | 0                                                                              | 0.89                                                                           |
| Ramachandran plot                                   |                                                                                |                                                                                |
| Favored (%)                                         | 99.74                                                                          | 99.20                                                                          |
| Allowed (%)                                         | 0.26                                                                           | 0.80                                                                           |
| Disallowed (%)                                      | 0.00                                                                           | 0.00                                                                           |

82

83 **Supplementary Table 2:** Comparison of beta-helical sizing of CsgA obtained from  
 84 experimental data and molecular simulation.

| CsgA                                                          | Adjacent strand distance (Å) | Helix height (Å) | Helix thickness (Å) | Helix width (Å) |
|---------------------------------------------------------------|------------------------------|------------------|---------------------|-----------------|
| <b>Experimental Data</b>                                      |                              |                  |                     |                 |
| CsgA<br>( <i>Escherichia coli</i> , cryo-EM)                  | 4.8±0.1                      | 19.1±0.1         | 8.6±0.2             | 32.7±0.7        |
| R15.5<br>( <i>Pontibacter korlensis</i> , cryo-EM) (2)        | ~4.8                         | N/A              | ~20                 | ~37             |
| CsgA<br>( <i>Escherichia coli</i> , x-ray diffraction)<br>(3) | ~4.7                         | N/A              | 9                   | N/A             |
| <b>Molecular simulation</b>                                   |                              |                  |                     |                 |
| CsgA ( <i>Escherichia coli</i> ) (4)                          | 4.8                          | ~19              | ~9                  | ~32             |
| CsgA ( <i>Escherichia coli</i> ) (5, 6)                       | 4.9 ± 0.4                    | 19.2 ± 0.9       | 9.6 ± 1.7           | 28.8 ± 2.0      |

85 **References:**

86

- 87 1. Deng X, Gonzalez Llamazares A, Wagstaff JM, Hale VL, Cannone G, McLaughlin SH,  
88 Kureisaite-Ciziene D, Löwe J. 2019. The structure of bactofilin filaments reveals their  
89 mode of membrane binding and lack of polarity. *Nature microbiology* 4:2357-2368.
- 90 2. Sleutel M, Pradhan B, Volkov AN, Remaut H. 2023. Structural analysis and architectural  
91 principles of the bacterial amyloid curli. *Nature Communications* 14:2822.
- 92 3. Shewmaker F, McGlinchey RP, Thurber KR, McPhie P, Dyda F, Tycko R, Wickner RB.  
93 2009. The functional curli amyloid is not based on in-register parallel  $\beta$ -sheet structure.  
94 *Journal of Biological Chemistry* 284:25065-25076.
- 95 4. Tian P, Boomsma W, Wang Y, Otzen DE, Jensen MH, Lindorff-Larsen K. 2015. Structure  
96 of a functional amyloid protein subunit computed using sequence variation. *Journal of the*  
97 *American Chemical Society* 137:22-25.
- 98 5. DeBenedictis E, Ma D, Keten S. 2017. Structural predictions for curli amyloid fibril subunits  
99 CsgA and CsgB. *RSC advances* 7:48102-48112.
- 100 6. Dunbar M, DeBenedictis E, Keten S. 2019. Dimerization energetics of curli fiber subunits  
101 CsgA and CsgB. *npj Computational Materials* 5:27.

102
